# Supplementary material
Source: PubMed Central journal article supplement (PMC4085765)
Supplement: cr201470x1.pdf [file cr201470x1.pdf]

## Supplementary information

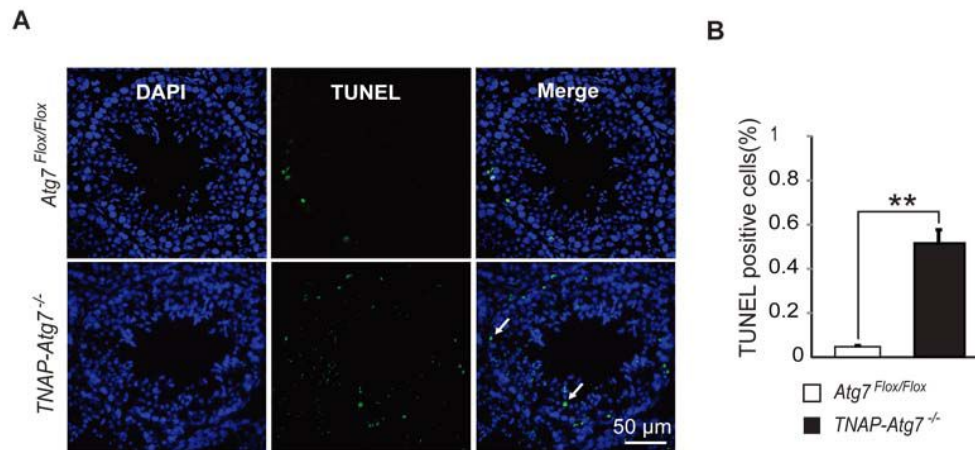

**Figure S1** Apoptosis detection by TUNEL in the seminiferous tubules of *TNAP-Atg7<sup>-/-</sup>* and the control mice. **(A)** Representative TUNEL results in the seminiferous tubules of *TNAP-Atg7<sup>-/-</sup>* and the control mice. **(B)** Percentage of apoptotic cells in the seminiferous tubules of *TNAP-Atg7<sup>-/-</sup>* and the control mice. *TNAP-Atg7<sup>-/-</sup>*,  $0.47 \pm 0.00$  %; *Atg7<sup>Fllox/Fllox</sup>*,  $0.04 \pm 0.00$  %.
