# Supplementary material
Source: PubMed Central journal article supplement (PMC4085765)
Supplement: cr201470x2.pdf [file cr201470x2.pdf]

**A**

| Experiments | Male                            | Female | No. of oocytes | No. of 2-cell embryos | Percentage of 2-cell embryos |
|-------------|---------------------------------|--------|----------------|-----------------------|------------------------------|
| 1           | <i>Atg7<sup>Flox/Flox</sup></i> | WT     | 7              | 19                    | 64.9                         |
| 2           |                                 | WT     | 8              | 37                    |                              |
| 3           |                                 | WT     | 20             | 13                    |                              |
| 1           | <i>TNAP-Atg7<sup>-/-</sup></i>  | WT     | 48             | 0                     | 0                            |
| 2           |                                 | WT     | 35             | 0                     |                              |
| 3           |                                 | WT     | 37             | 0                     |                              |

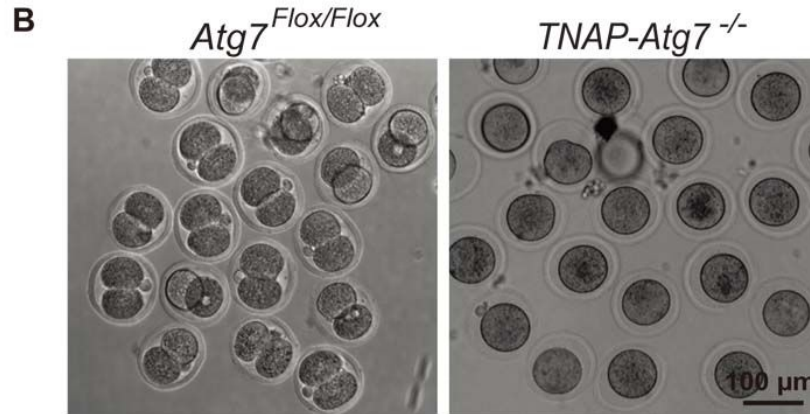

**Figure S2** *In vivo* fertilization capacity of control and *TNAP-Atg7<sup>-/-</sup>* mouse spermatozoa. **(A)**

The control or *TNAP-Atg7<sup>-/-</sup>* male mice were mated with the wild-type, and female oviducts were checked for 2-cell embryos. No *TNAP-Atg7<sup>-/-</sup>* mice had 2-cell embryos, compared with

64.9% in the control group. **(B)** Representative images of the experiment in A. Bar: 100 µm.
