# Supplementary material
Source: PubMed Central journal article supplement (PMC4085765)
Supplement: cr201470x3.pdf [file cr201470x3.pdf]

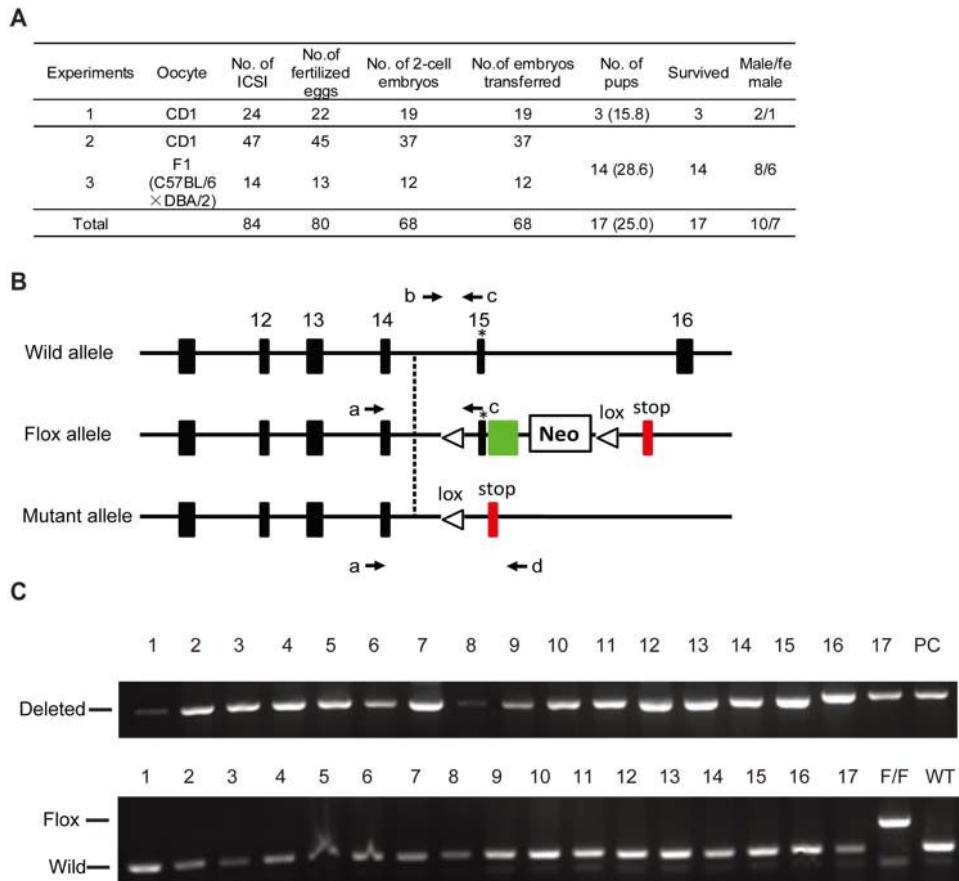

**Figure S3** *In vivo* development after ICSI. **(A)** Normal development of pups from ICSI. **(B)** The positions of PCR primers in the wild-type *Atg7* allele, the floxed allele, and the deleted allele. Primers a and c were used for amplification of the floxed allele, primers b and c for the wild-type allele, and primers a and d for the deleted allele. Black boxes indicate exons 12-16. **(C)** Genomic DNA extracted from ICSI offspring were analyzed by PCR. Lanes 1 to 17 represent the number of pups. PC, positive control, use of *TNAP-Atg7<sup>-/-</sup>* testis DNA as template; F/F, *Atg7<sup>Flox/Flox</sup>*; WT, wild-type.
