# Supplementary material
Source: PubMed Central journal article supplement (PMC4085765)
Supplement: cr201470x6.pdf [file cr201470x6.pdf]

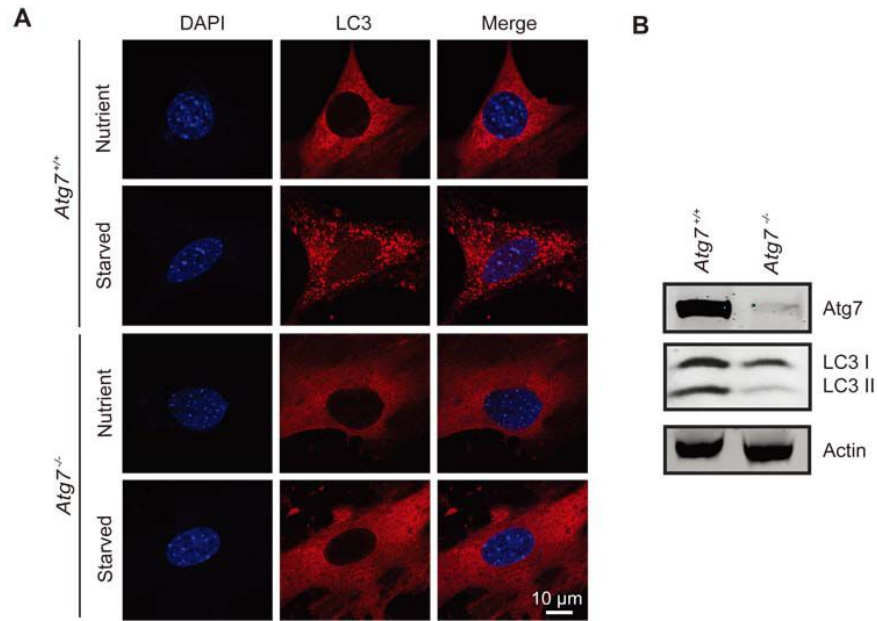

**Figure S6** Effect of Atg7 knockout on autophagosome formation in MEFs under classical starvation conditions. **(A)** LC3 immunofluorescence in wild-type (upper panel) and Atg7<sup>-/-</sup> MEFs (lower panel). LC3 was evenly distributed in the cytoplasm of MEFs without nutrient deprivation. Upon 12 hours of starvation with HBSS containing calcium and magnesium ions, canonical autophagosome formation (punctate LC3 signal) was found in the wild-type MEFs, but not in the Atg7<sup>-/-</sup> MEFs. Bar: 10  $\mu$ m. **(B)** Confirmation of Atg7<sup>-/-</sup> MEFs. Note: Atg7 protein was almost completely depleted, and LC3 II decreased significantly in the Atg7<sup>-/-</sup> MEFs. Actin was used as a loading control.
