# Supplementary material
Source: PubMed Central journal article supplement (PMC4085765)
Supplement: cr201470x7.pdf [file cr201470x7.pdf]

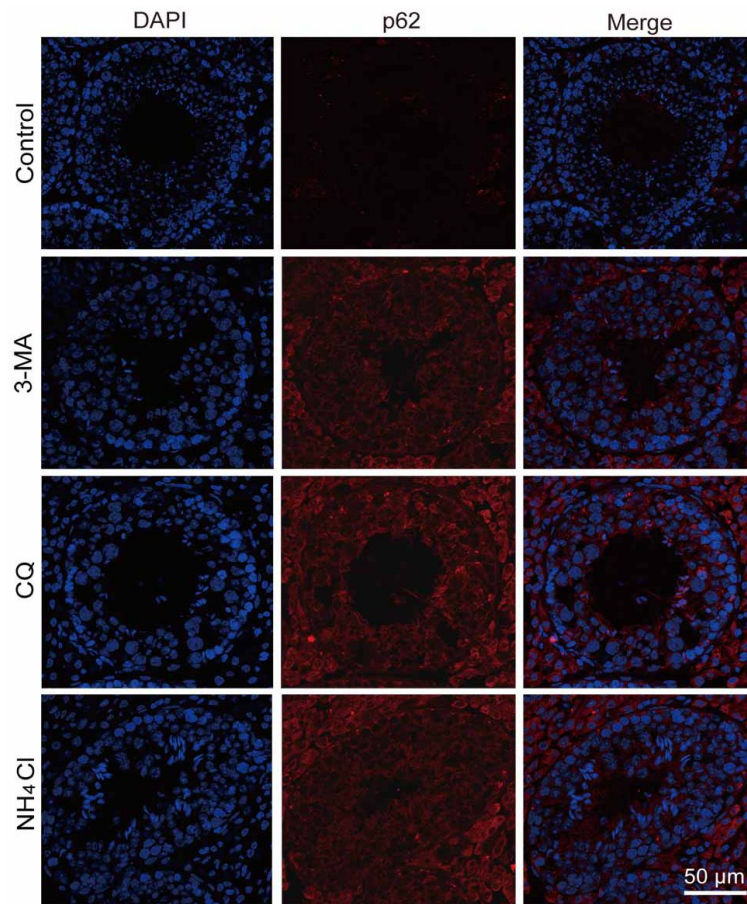

**Figure S7** p62 immunofluorescence in the control and autophagy/lysosome inhibitor-treated testis. p62 accumulation was detected by immunofluorescence after 1-2 weeks treatment with 3-MA, chloroquine or ammonium chloride.
