# Supplementary material
Source: PubMed Central journal article supplement (PMC4085765)
Supplement: cr201470x8.pdf [file cr201470x8.pdf]

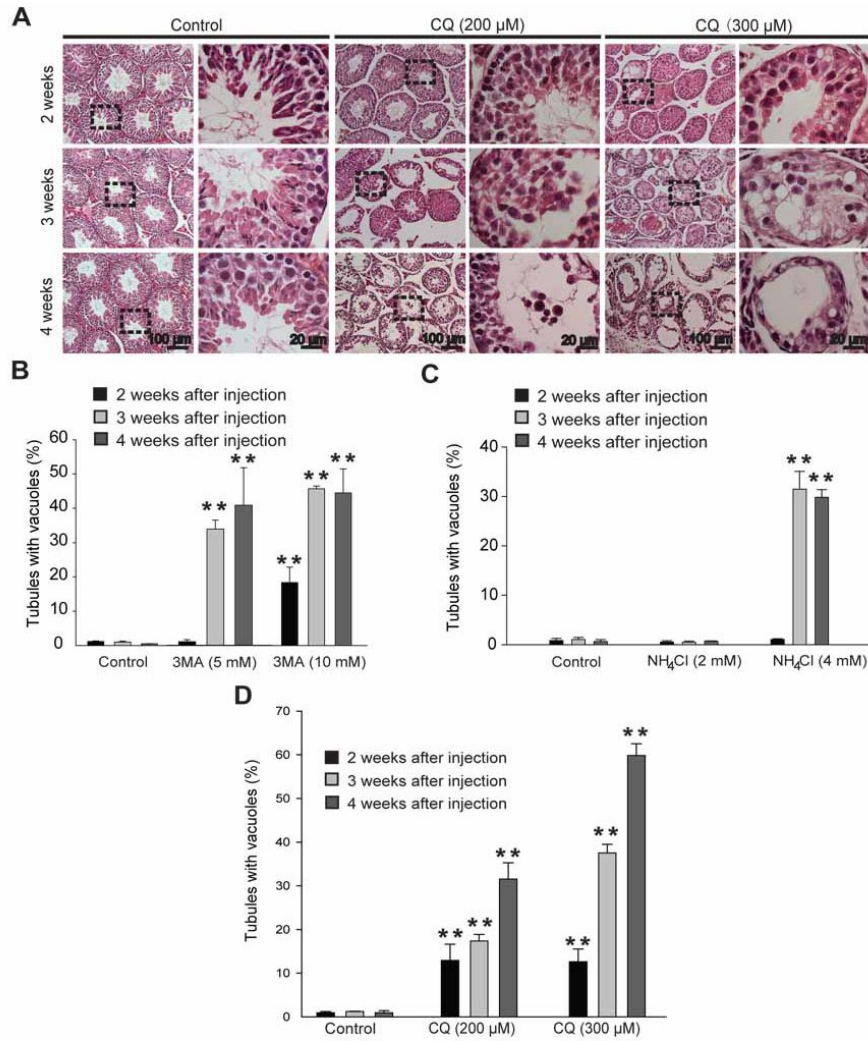

**Figure S8** Spermatogenesis is disrupted by 3-MA, CQ or NH<sub>4</sub>Cl injection into the testis. **(A)** Histological analysis of seminiferous tubules from testes injected with CQ for 2, 3 or 4 weeks. Vacuoles appeared in some tubules after injection for two weeks. Physiological saline was injected as a control. **(B)** Vacuolization rate of seminiferous tubules after injection with 3-MA. **(C)** Vacuolization rate of seminiferous tubules after injection with NH<sub>4</sub>Cl. **(D)** Vacuolization rate of seminiferous tubules after injection with CQ.
