# Supplementary material
Source: PubMed Central journal article supplement (PMC4085765)
Supplement: cr201470x9.pdf [file cr201470x9.pdf]

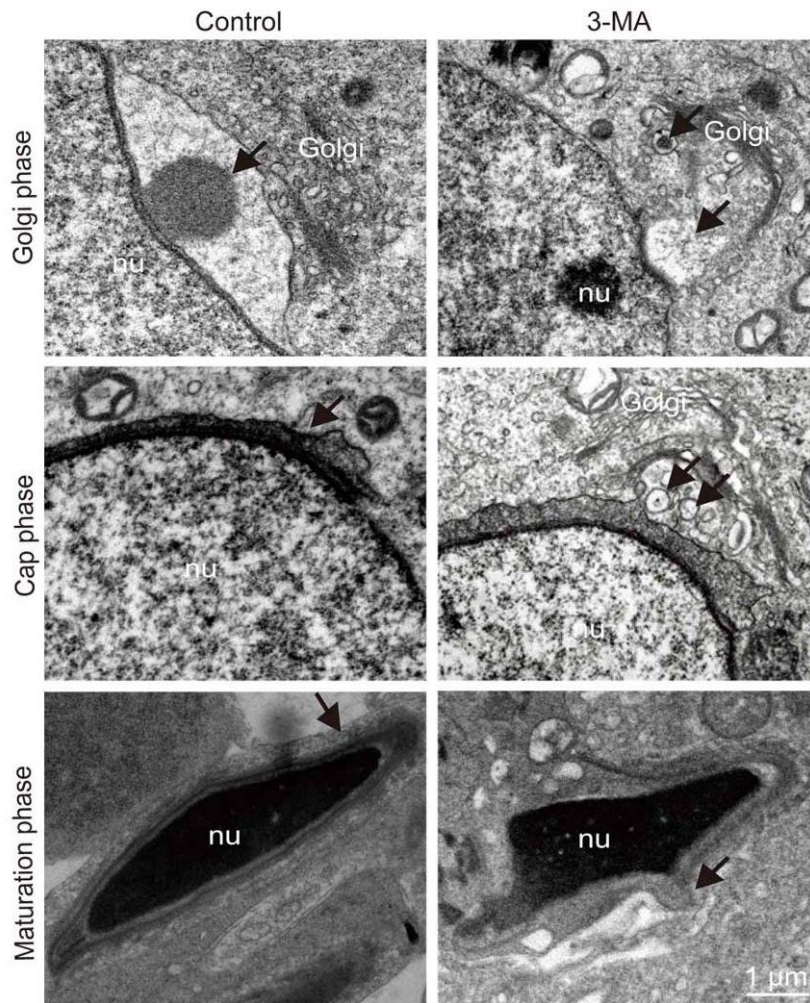

**Figure S9** TEM analysis of testis after treatment with 3-MA. In the Golgi phase, typical acrosomal granules localized in the center (arrow) of the proacrosomal structure in the physiological saline-treated testis. In the 3-MA treated testis, some proacrosomal vesicles failed to be transported to the center of the acrosome (arrows, upper panel). In the cap phase, the Golgi apparatus was still close to the proacrosomal structure, with some vesicles accumulated in the concave region of the nuclear surface (arrows, middle panel). Finally, the acrosomes were malformed in the maturation phase (arrow, lower panel). nu, nucleus; Golgi, Golgi apparatus. Bar indicates 1  $\mu\text{m}$ .
