# Supplementary material
Source: PubMed Central journal article supplement (PMC4085765)
Supplement: cr201470x10.pdf [file cr201470x10.pdf]

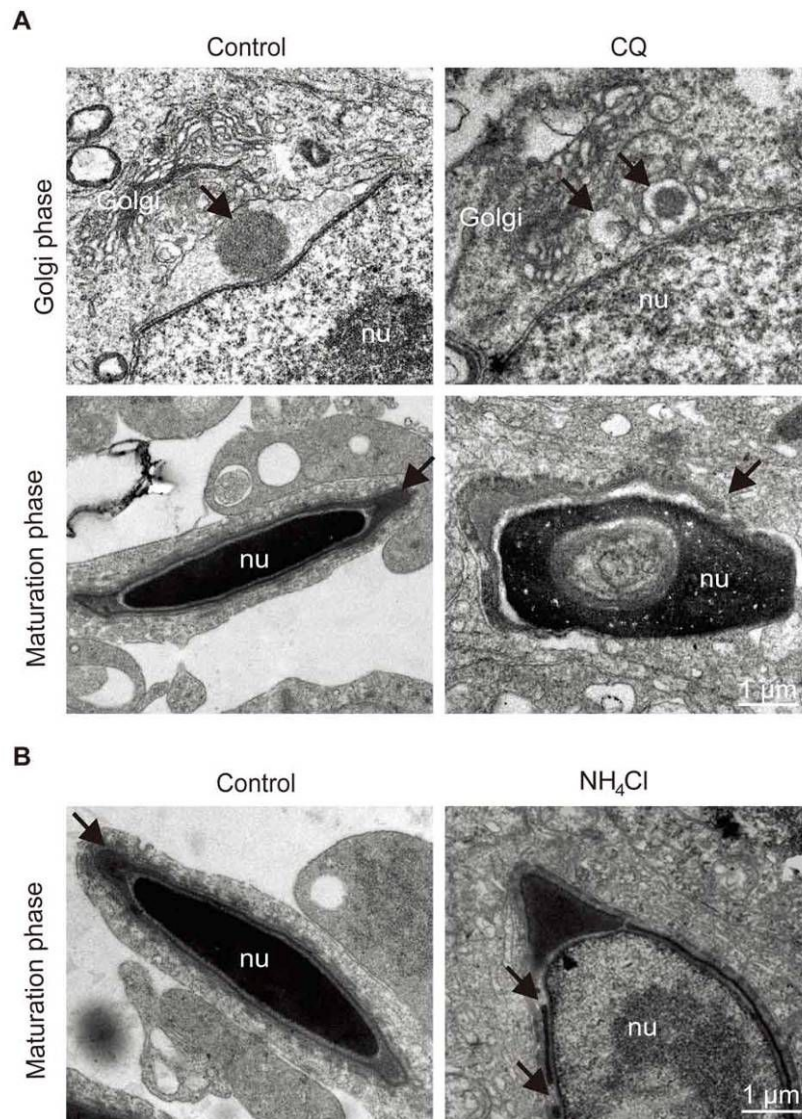

**Figure S10** TEM analysis of testis of chloroquine- and ammonium chloride-treated mouse testis. **(A)** In the control testis, vesicles derived from the Golgi apparatus were transported to the proacrosomal center, which contained a single acrosomal granule (arrow). In the CQ-treated group, more than one proacrosomal granule accumulated in the concave region of the nuclear surface (arrows). In the maturation phase, many abnormal acrosomes were found in the treated testis (arrow). **(B)** Malformed acrosomes on the spermatids in the maturation phase of NH<sub>4</sub>Cl-treated testis (arrow). nu, nucleus; Golgi, Golgi apparatus. Bar indicates 1 μm.
