# Supplementary material
Source: PubMed Central journal article supplement (PMC4085765)
Supplement: cr201470x11.pdf [file cr201470x11.pdf]

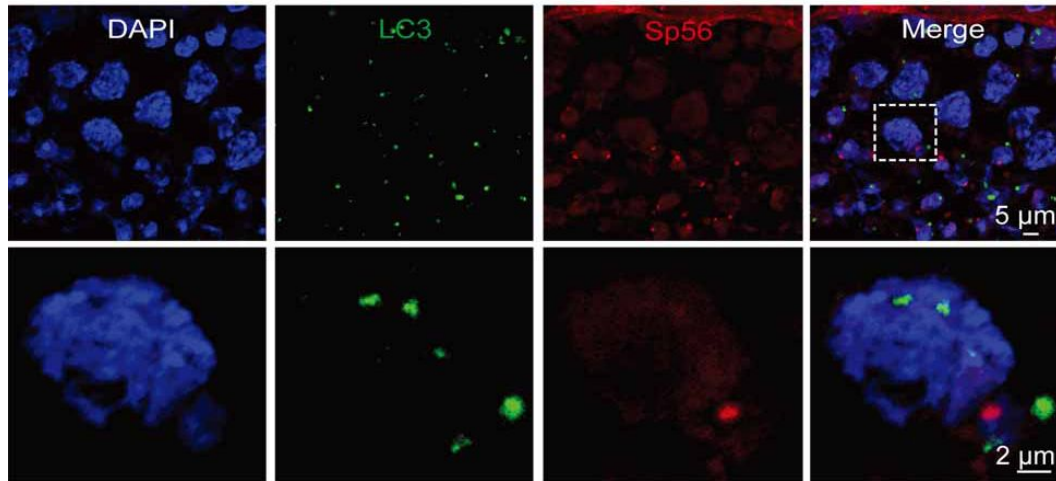

**Figure S11** LC3 did not co-localize with the acrosome maker sp56 in round spermatids.

Immunodetection of LC3 (green) and sp56 (red) in the seminiferous tubules of wild-type mice.
